# Supplementary material for: Employment, Economic, and Sociodemographic Factors Associated with Changes in Smoking and Drinking Behaviors during the COVID-19 Pandemic in South Korea
Source: MDPI journal article supplement (doi:10.3390/ijerph19052802), 2022-02-28
Supplement: s1 [file s1]

**Supplementary Table S1** Multinomial logistic regression results for the associations between a range of factors and the changes in smoking and alcohol consumption using the categorical household income variable

|                                                  | Smoking                   |                          | Alcohol consumption      |                          |
|--------------------------------------------------|---------------------------|--------------------------|--------------------------|--------------------------|
|                                                  | Increased                 | Decreased                | Increased                | Decreased                |
| Male (ref: female)                               | <b>3.19 [1.24; 8.24]</b>  | 0.98 [0.64; 1.51]        | <b>1.89 [1.42; 2.50]</b> | <b>1.58 [1.40; 1.78]</b> |
| Household income (ref: more than 10 million won) |                           |                          |                          |                          |
| 9-10 million won                                 | 0.98 [0.19; 5.14]         | 0.47 [0.16; 1.38]        | 1.09 [0.24; 5.03]        | 1.19 [0.72; 1.97]        |
| 8-9 million won                                  | 0.46 [0.09; 2.35]         | <b>0.22 [0.06; 0.81]</b> | 1.62 [0.63; 4.17]        | 0.71 [0.47; 1.08]        |
| 7-8 million won                                  | 0.47 [0.14; 1.63]         | <b>0.30 [0.14; 0.64]</b> | 1.85 [0.89; 3.84]        | <b>0.73 [0.53; 1.00]</b> |
| 6-7 million won                                  | 0.58 [0.25; 1.37]         | <b>0.31 [0.18; 0.53]</b> | 0.92 [0.46; 1.84]        | <b>0.48 [0.36; 0.62]</b> |
| 5-6 million won                                  | 0.49 [0.23; 1.05]         | <b>0.20 [0.12; 0.32]</b> | 1.14 [0.62; 2.11]        | <b>0.63 [0.50; 0.79]</b> |
| 4-5 million won                                  | 0.54 [0.26; 1.12]         | <b>0.24 [0.15; 0.37]</b> | 1.24 [0.68; 2.24]        | <b>0.53 [0.42; 0.66]</b> |
| 3-4 million won                                  | 0.52 [0.25; 1.10]         | <b>0.25 [0.16; 0.39]</b> | 0.88 [0.48; 1.61]        | <b>0.46 [0.36; 0.57]</b> |
| 2-3 million won                                  | 0.72 [0.33; 1.56]         | <b>0.32 [0.19; 0.54]</b> | 1.31 [0.71; 2.43]        | <b>0.63 [0.49; 0.80]</b> |
| 1-2 million won                                  | 0.39 [0.13; 1.21]         | <b>0.18 [0.08; 0.41]</b> | 0.93 [0.42; 2.05]        | <b>0.64 [0.46; 0.88]</b> |
| less than 1 million won                          | 1.27 [0.25; 6.53]         | 0.45 [0.12; 1.66]        | 0.61 [0.15; 2.41]        | 1.08 [0.66; 1.77]        |
| no income                                        | 1.13 [0.09; 14.12]        | 0.41 [0.07; 2.46]        | 1.70 [0.44; 6.53]        | 1.05 [0.60; 1.82]        |
| Basic living allowance (ref: no)                 | <b>4.32 [1.34; 13.96]</b> | 0.93 [0.19; 4.49]        | 1.08 [0.36; 3.21]        | 0.89 [0.48; 1.64]        |
| Homeownership (ref: homeowner)                   |                           |                          |                          |                          |
| Long-term rent with deposit                      | 1.21 [0.74; 1.97]         | 0.86 [0.62; 1.21]        | 1.07 [0.78; 1.46]        | <b>0.77 [0.66; 0.88]</b> |
| Monthly rent                                     | 0.95 [0.39; 2.28]         | 0.92 [0.53; 1.59]        | 1.28 [0.75; 2.16]        | 1.01 [0.79; 1.28]        |
| Employment status (ref: regular employees)       |                           |                          |                          |                          |
| Self-employed                                    | <b>2.72 [1.74; 4.25]</b>  | 0.81 [0.56; 1.17]        | <b>2.22 [1.61; 3.06]</b> | 1.04 [0.88; 1.21]        |
| Temporary worker                                 | 1.31 [0.56; 3.06]         | <b>1.85 [1.14; 3.00]</b> | 1.32 [0.75; 2.31]        | <b>1.28 [1.03; 1.60]</b> |
| Unemployed                                       | <b>3.39 [1.70; 6.76]</b>  | <b>1.59 [1.01; 2.51]</b> | 1.39 [0.95; 2.02]        | 0.90 [0.76; 1.05]        |
| Living alone (ref: living with someone)          | 1.34 [0.66; 2.70]         | <b>0.57 [0.32; 0.99]</b> | <b>2.20 [1.42; 3.41]</b> | 0.92 [0.72; 1.17]        |
| Offline friends                                  | 1.04 [0.99; 1.10]         | <b>0.95 [0.91; 0.99]</b> | <b>1.04 [1.00; 1.07]</b> | 1.00 [0.99; 1.02]        |
| Chronic disease (ref: none)                      |                           |                          |                          |                          |
| 6 months or less                                 | <b>2.21 [1.13; 4.33]</b>  | 1.42 [0.78; 2.57]        | <b>2.19 [1.31; 3.67]</b> | <b>1.64 [1.23; 2.18]</b> |
| More than 6 months                               | <b>2.38 [1.40; 4.06]</b>  | 0.65 [0.39; 1.08]        | <b>2.26 [1.52; 3.38]</b> | 1.03 [0.83; 1.28]        |
| N                                                | 2179                      |                          | 7662                     |                          |

Estimates with  $p < 0.05$  are bolded.

Age and household income were included as spline functions. Coefficients for intercept, age, household, and location of residence are omitted.

**Supplementary Table S2** Multinomial logistic regression results for the associations between a range of factors and the changes in smoking and alcohol consumption among those aged 20 or older

|                                            | Smoking                   |                          | Alcohol consumption      |                          |
|--------------------------------------------|---------------------------|--------------------------|--------------------------|--------------------------|
|                                            | Increased                 | Decreased                | Increased                | Decreased                |
| Male (ref: female)                         | <b>3.22 [1.25; 8.31]</b>  | 0.95 [0.62; 1.46]        | <b>1.88 [1.41; 2.49]</b> | <b>1.60 [1.42; 1.81]</b> |
| Basic living allowance (ref: no)           | <b>4.38 [1.36; 14.07]</b> | 0.90 [0.19; 4.32]        | 1.01 [0.34; 3.01]        | 0.90 [0.19; 4.32]        |
| Homeownership (ref: homeowner)             |                           |                          |                          |                          |
| <i>Long-term rent with deposit</i>         | 1.19 [0.73; 1.94]         | 0.85 [0.61; 1.19]        | 1.09 [0.79; 1.49]        | <b>0.77 [0.67; 0.89]</b> |
| <i>Monthly rent</i>                        | 0.94 [0.39; 2.25]         | 0.84 [0.47; 1.48]        | 1.29 [0.76; 2.18]        | 1.01 [0.79; 1.28]        |
| Employment status (ref: regular employees) |                           |                          |                          |                          |
| <i>Self-employed</i>                       | <b>2.70 [1.73; 4.20]</b>  | 0.79 [0.55; 1.14]        | <b>2.16 [1.57; 2.97]</b> | 1.03 [0.88; 1.21]        |
| <i>Temporary worker</i>                    | 1.24 [0.53; 2.89]         | <b>1.79 [1.11; 2.89]</b> | 1.28 [0.73; 2.25]        | <b>1.26 [1.01; 1.57]</b> |
| <i>Unemployed</i>                          | <b>3.30 [1.68; 6.50]</b>  | 1.55 [0.99; 2.44]        | 1.35 [0.92; 1.97]        | 0.91 [0.77; 1.06]        |
| Living alone (ref: living with someone)    | 1.34 [0.67; 2.66]         | 0.59 [0.34; 1.02]        | <b>2.14 [1.38; 3.30]</b> | 0.93 [0.73; 1.18]        |
| Offline friends                            | 1.04 [0.99; 1.10]         | <b>0.95 [0.91; 0.99]</b> | <b>1.04 [1.00; 1.07]</b> | 1.00 [0.99; 1.02]        |
| Chronic disease (ref: none)                |                           |                          |                          |                          |
| <i>6 months or less</i>                    | <b>2.16 [1.11; 4.22]</b>  | 1.43 [0.79; 2.58]        | <b>2.18 [1.31; 3.65]</b> | <b>1.63 [1.23; 2.17]</b> |
| <i>More than 6 months</i>                  | <b>2.32 [1.36; 3.94]</b>  | 0.61 [0.37; 1.02]        | <b>2.25 [1.51; 3.36]</b> | 1.03 [0.83; 1.28]        |
| N                                          | 2168                      |                          | 7550                     |                          |

Estimates with  $p < 0.05$  are bolded.

Age and household income were included as spline functions. Coefficients for intercept, age, household, and location of residence are omitted.
